# Supplementary material
Source: PubMed Central journal article supplement (PMC8208501)

1 SUPPLEMETNAL MATERIAL FOR

2  
3 **PET Imaging of Regional vs Global Myocardial Sympathetic Activity to Improve Risk**  
4 **Stratification in Patients with Ischemic Cardiomyopathy**

5 **Running Title:** Regional Denervation and SCA Risk

6  
7 **Authors:** Jason G. E. Zelt, PhD<sup>a,b,c\*</sup>; Jean Zhuo Wang, BHSc<sup>a,b\*</sup>; Lisa M. Mielniczuk MSc,  
8 MD<sup>a,b,c</sup>; Rob S.B. Beanlands, MD<sup>a,b</sup>; James A. Fallavollita, MD<sup>d,e</sup>; John M. Canty Jr., MD<sup>d,e</sup>;  
9 Robert A. deKemp, PhD<sup>a,b</sup>.

10  
11 \*Equal Contribution by authors

12  
13 <sup>a</sup>Department of Medicine (Cardiology), University of Ottawa Heart Institute, Ottawa, Canada

14 <sup>b</sup>Faculty of Medicine, University of Ottawa, Ottawa, Canada

15 <sup>c</sup>Department of Cellular and Molecular Medicine, University of Ottawa, Ottawa, Canada

16 <sup>d</sup>VA Western New York Healthcare System, Buffalo, NY, USA.

17 <sup>e</sup>Division of Cardiovascular Medicine, University of Buffalo, Buffalo, NY, USA

18  
19 **Author emails:**

|                                                |                                         |                                             |
|------------------------------------------------|-----------------------------------------|---------------------------------------------|
| Jason Zelt:<br>JZelt@ottawaheart.ca            | Jean Wang:<br>zwang342@uottawa.ca       | Rob Beanlands:<br>RBeanlands@ottawaheart.ca |
| Lisa Mielniczuk:<br>lmielniczuk@ottawaheart.ca | James Fallavollita:<br>jaf7@buffalo.edu | John Canty: canty@buffalo.edu               |
| Robert deKemp:<br>RAdeKemp@ottawaheart.ca      |                                         |                                             |

20 **Address for Correspondence:**

Dr. Robert deKemp  
40 Ruskin Street, Ottawa  
Ontario, Canada, K1Y 4W7  
Email; RAdeKemp@ottawaheart.ca  
Fax 613-696-7104; Phone 613-696-7347

### Regional Heterogeneity Parameters

### Global Scale Parameters

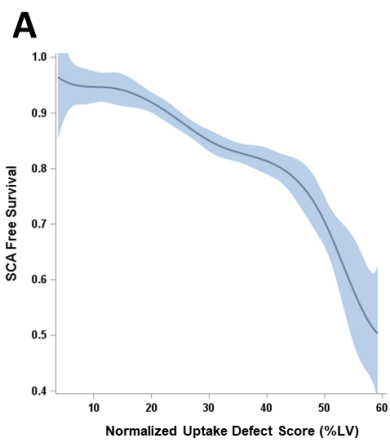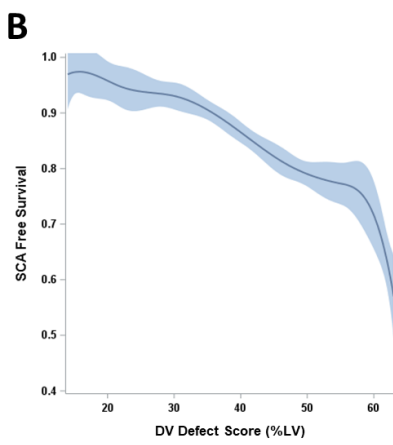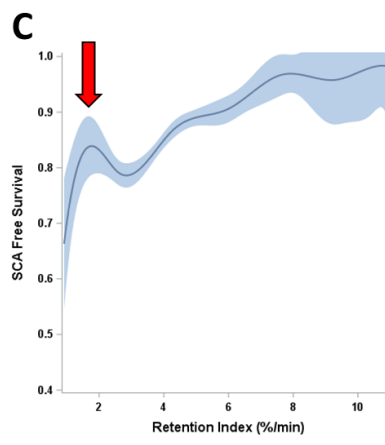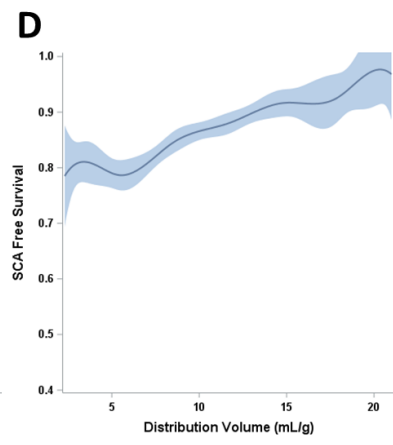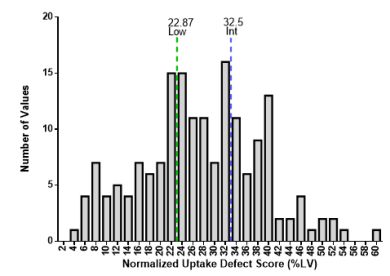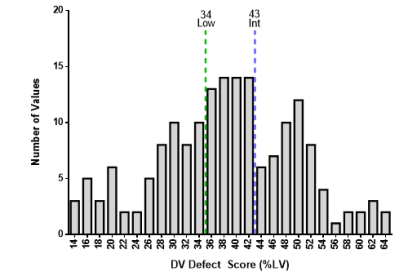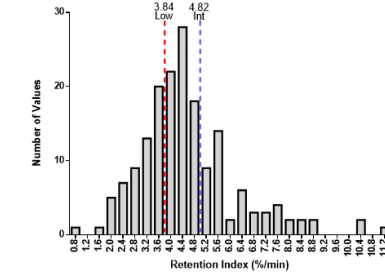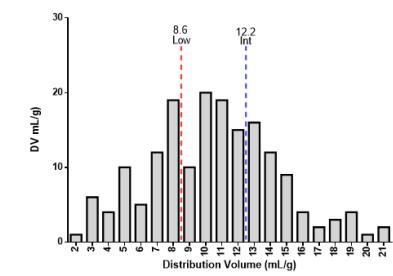

Supplement: NIHMS1700307-supplement-Supplemental_Material.pdf [file NIHMS1700307-supplement-Supplemental_Material.pdf]
